# Supplementary material for: PECAM‐1 supports leukocyte diapedesis by tension‐dependent dephosphorylation of VE‐cadherin
Source: PubMed Central journal article supplement — EMBO J. 2021 Feb 19;40(9):e106113. doi: 10.15252/embj.2020106113 (PMC8090850; doi:10.15252/embj.2020106113), 2021-02-19

## Expanded View Figures

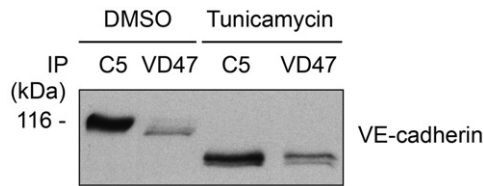

**Figure EV1. Reduced apparent molecular weight of VE-cadherin proform is due to immature glycosylation.**

bEnd.5 cells were treated with tunicamycin or DMSO for 48 h prior to cell lysis. VE-cadherin was precipitated from cell lysates with the antibodies C5 (mature VE-cadherin) or VD47 (proform of VE-cadherin). Precipitates were analyzed by Western blotting with antibodies against VE-cadherin. Molecular weight marker is indicated in kDa.

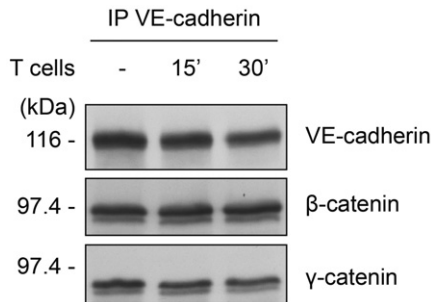

**Figure EV2. Leukocytes do not trigger the dissociation of β-catenin or plakoglobin from VE-cadherin.**

bEnd.5 cells were stimulated with TNF-α for 18 h prior to incubation with antigen-stimulated mouse T cells for 0–30 min. VE-cadherin was immunoprecipitated from cell lysates, and precipitates were analyzed by immunoblots for indicated antigens.

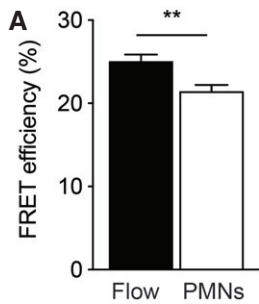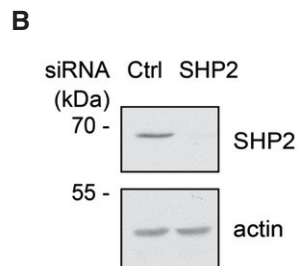

**Figure EV3. Leukocyte-induced tension across VE-cadherin is independent of SHP2, and tension is not required for SHP2 dissociation from PECAM-1.**

**A** Quantification of FRET efficiency (percentage) at junctions of HUVEC treated with siRNAs for SHP2 and VE-cadherin prior to transducing VE-cadherin-FL. Cells were exposed either to flow alone or to flow in the presence of PMNs and then fixed with 4% PFA followed by FLIM measurements at sites of PMN transmigration (PMN) or at junctions without PMNs (Flow).

**B** Representative immunoblot for SHP2 and actin expression of HUVEC used for the experiments in (A).

**C** HUVEC were grown on collagen-coated polyacrylamide gels of varying physiologic stiffness of 0.2 kPa (left) and 20 kPa (right) and stimulated with TNF-α for 17 h prior to adding HL60-derived neutrophils for 20 min. PECAM-1 immunoprecipitates and cell lysates were immunoblotted for the indicated antigens. Note that leukocytes triggered SHP2 dissociation from PECAM-1 independent of substrate stiffness.

Data information: Graph in (A) represents  $n = 21$  and 20 measurements in a total of four independent experiments. Bars and error bars indicate mean  $\pm$  SEM. Statistical significance was tested with unpaired  $t$ -test,  $**P < 0.01$ . Blots are representative for 3 experiments (C).

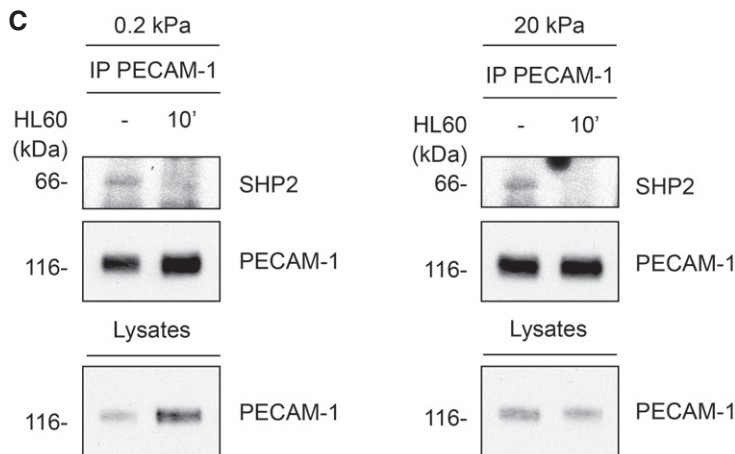

Supplement: EMBJ-40-e106113-s003.pdf [file EMBJ-40-e106113-s003.pdf]
