# Supplementary figures and images for: PECAM‐1 supports leukocyte diapedesis by tension‐dependent dephosphorylation of VE‐cadherin
Source: PubMed Central journal article supplement — EMBO J. 2021 Feb 19;40(9):e106113. doi: 10.15252/embj.2020106113 (PMC8090850; doi:10.15252/embj.2020106113), 2021-02-19

## Source Data for Figure 2

**2A**

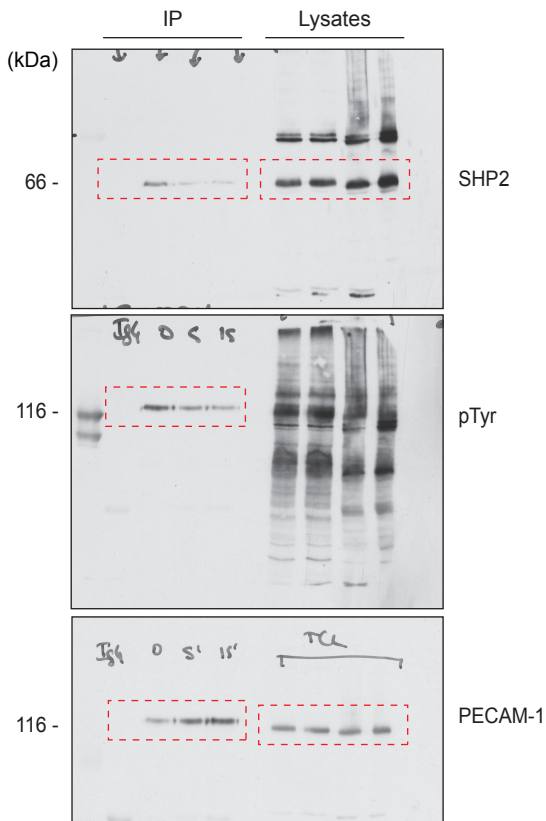

**2B**

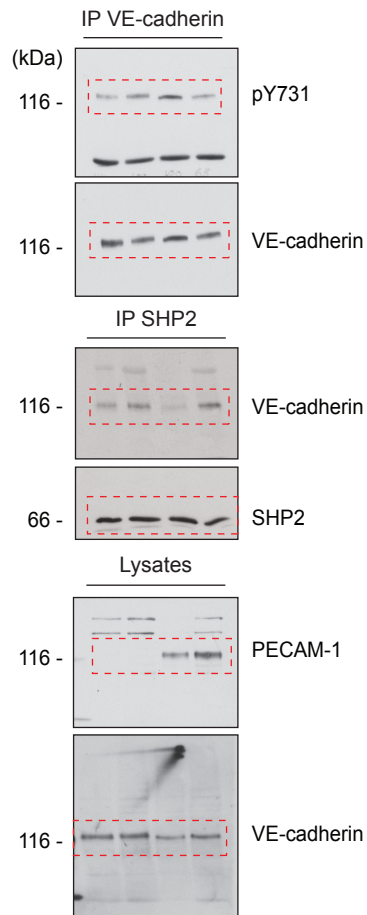

**2C**

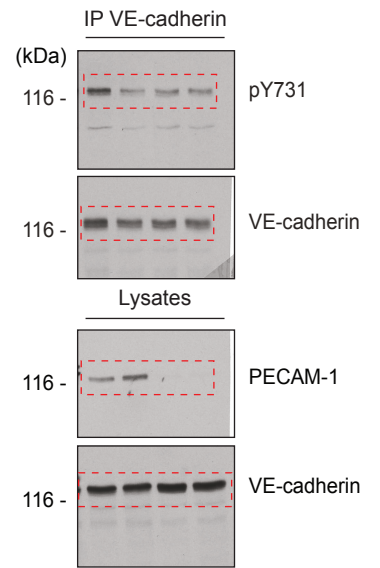

**2D**

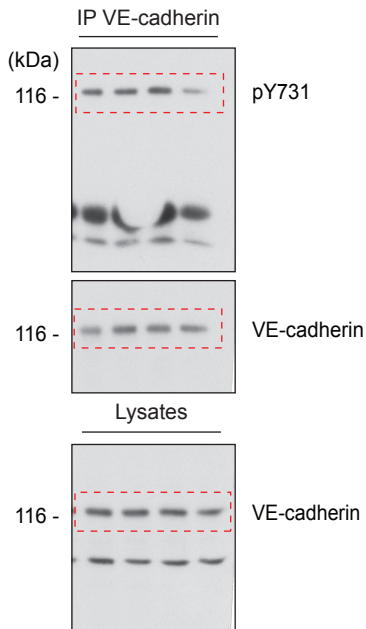

**2E**

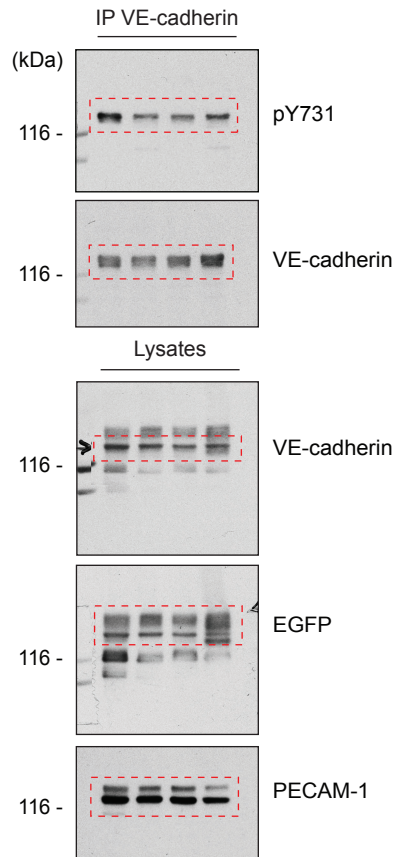

Supplement: EMBJ-40-e106113-s001.pdf [file EMBJ-40-e106113-s001.pdf]

# Source Data for Figure 6

**6B**

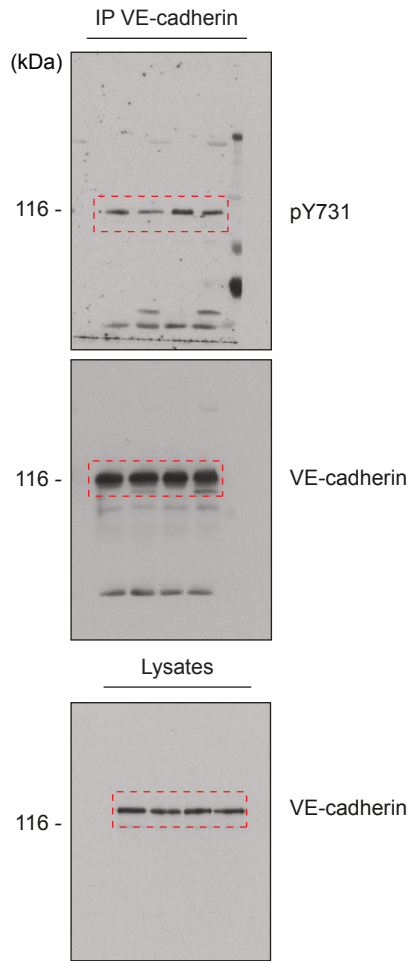

**6E**

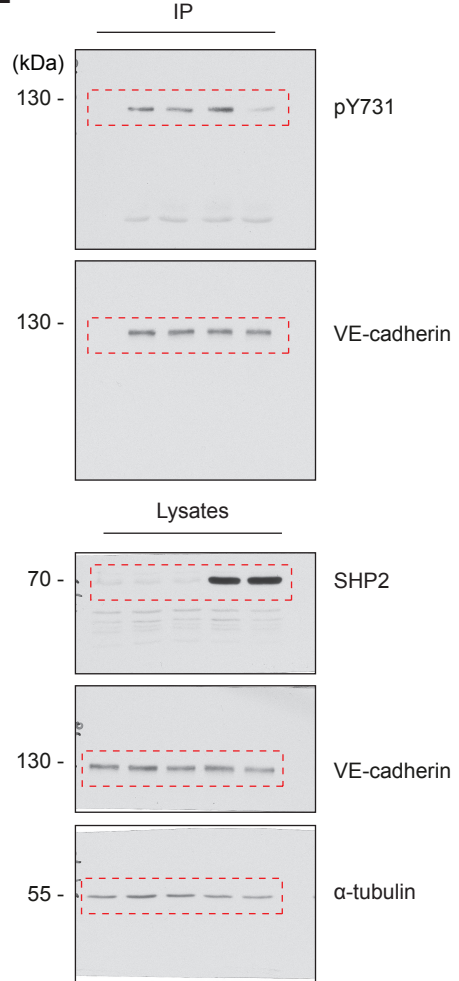

**6D**

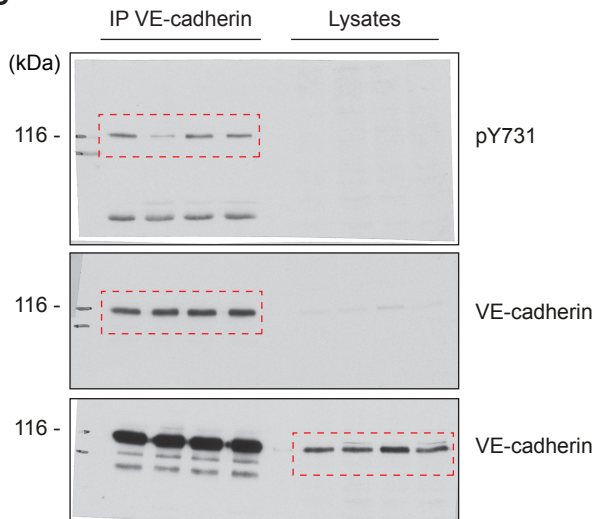

Supplement: EMBJ-40-e106113-s004.pdf [file EMBJ-40-e106113-s004.pdf]

# Source Data for Figure 7

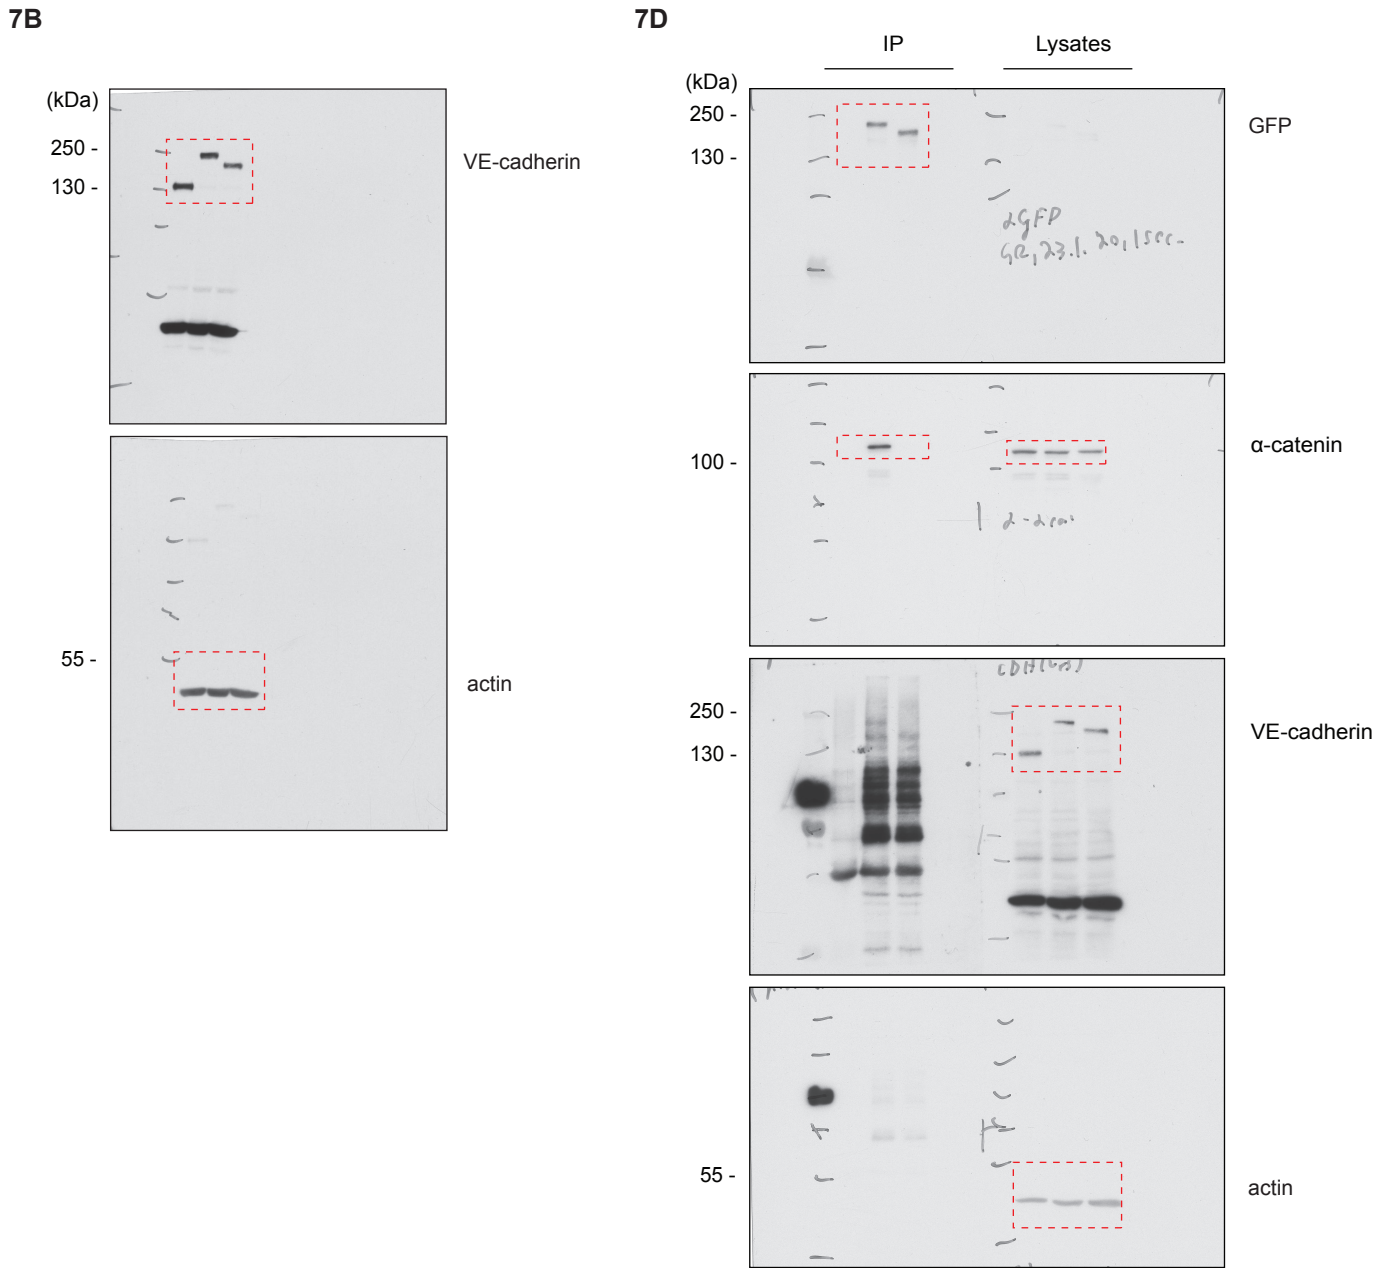

Supplement: EMBJ-40-e106113-s006.pdf [file EMBJ-40-e106113-s006.pdf]

# Source Data for Figure 8

8F

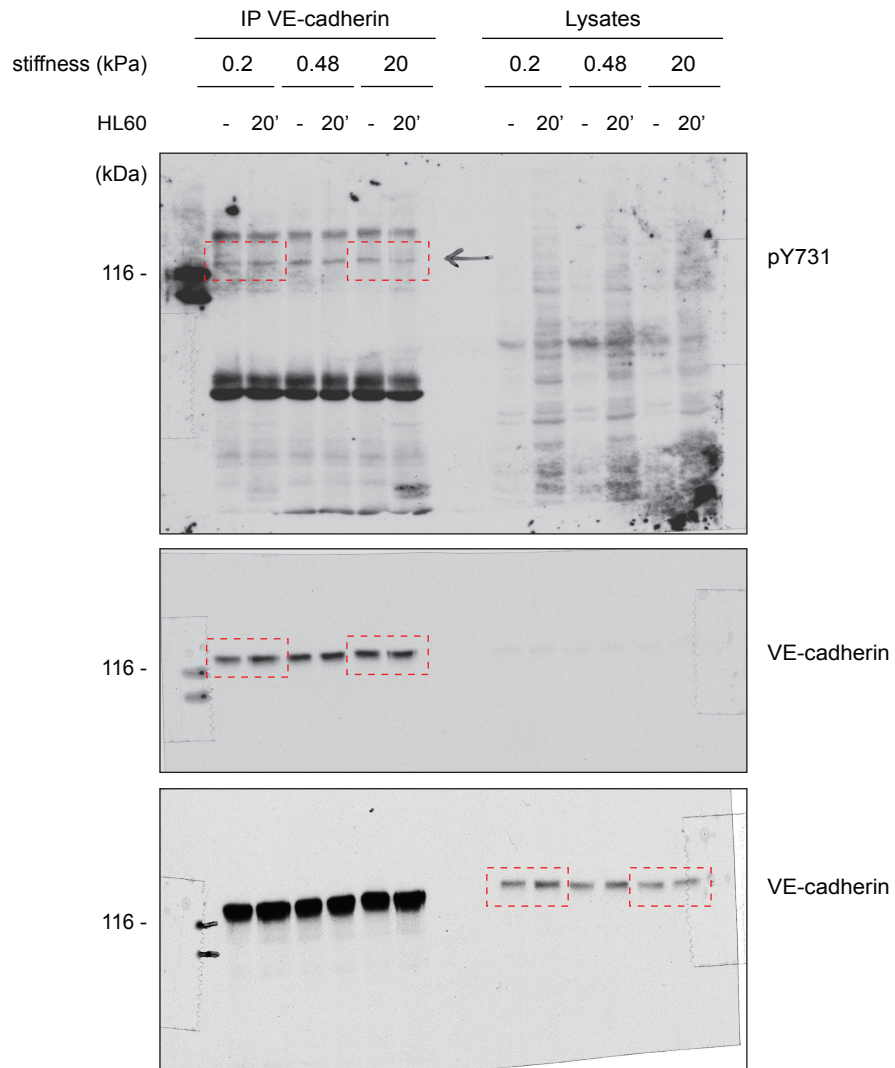

Supplement: EMBJ-40-e106113-s007.pdf [file EMBJ-40-e106113-s007.pdf]

# Source Data for Figure 1

1A

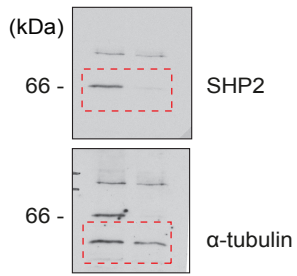

1B

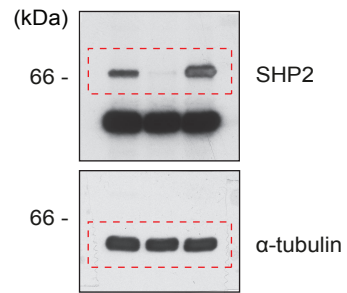

1C

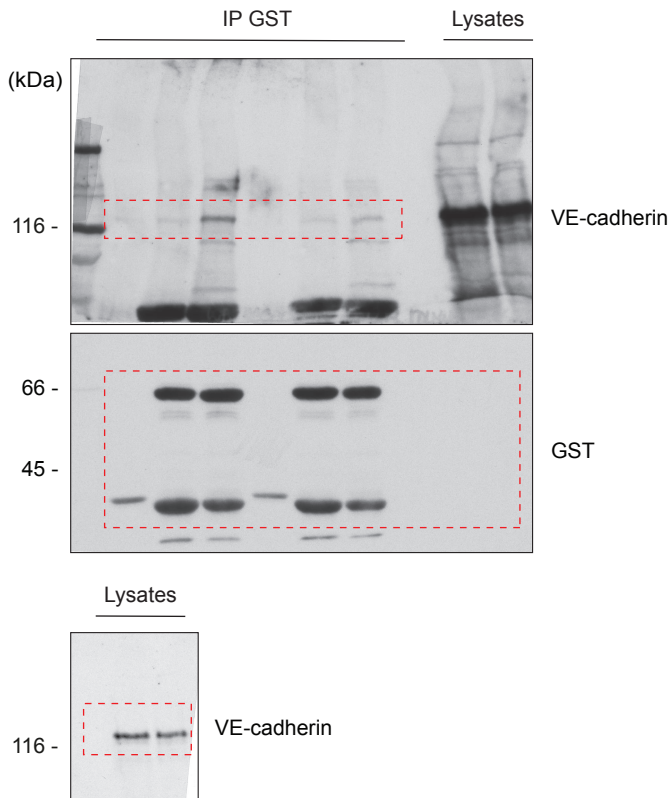

1D

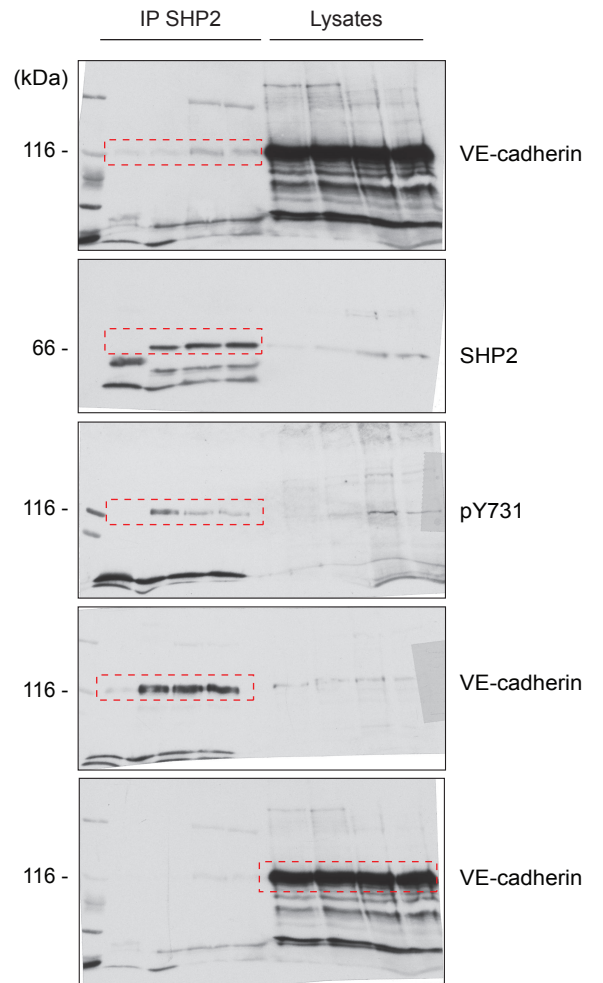

Supplement: EMBJ-40-e106113-s008.pdf [file EMBJ-40-e106113-s008.pdf]

# Source Data for Figure 5

5A

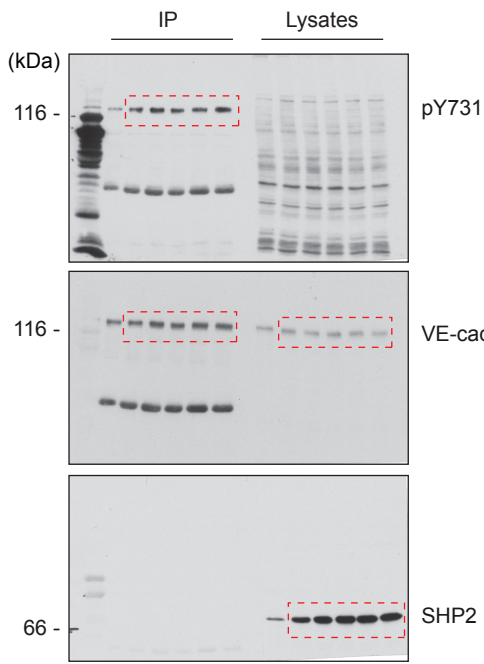

5B

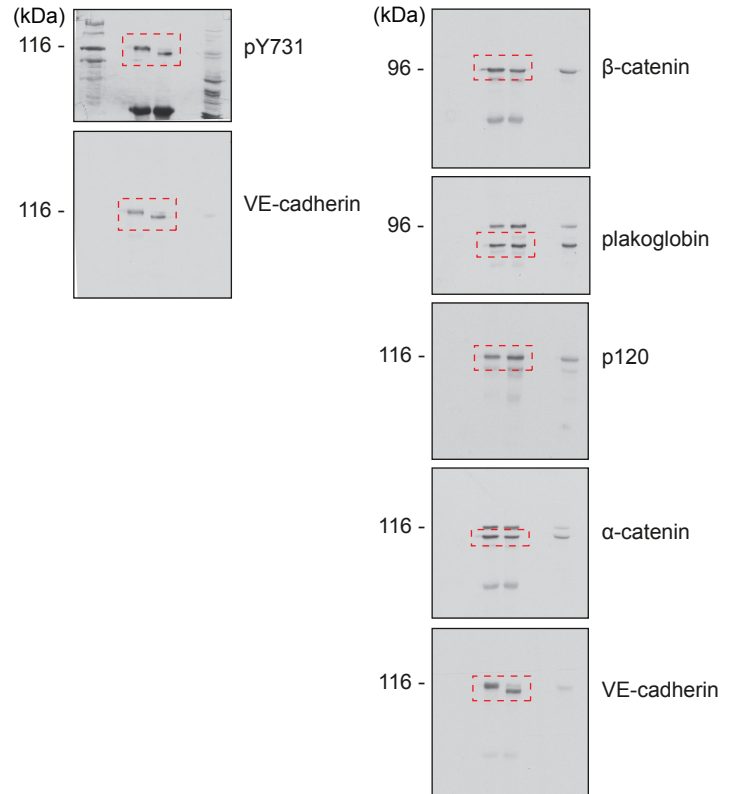

5C

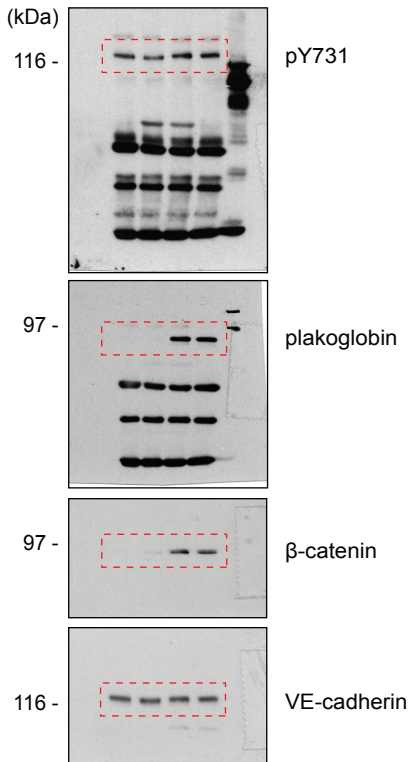

Supplement: EMBJ-40-e106113-s009.pdf [file EMBJ-40-e106113-s009.pdf]

Source Data for Figure 3

3A

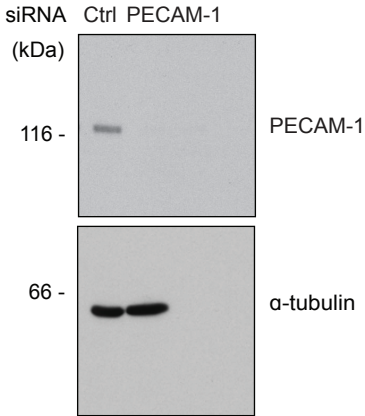

3B

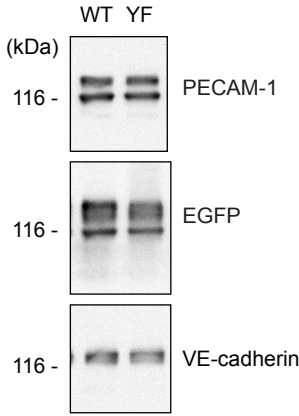

Supplement: EMBJ-40-e106113-s010.pdf [file EMBJ-40-e106113-s010.pdf]
